# Supplementary material for: Confusoside from Anneslea fragrans Alleviates Acetaminophen-Induced Liver Injury in HepG2 via PI3K-CASP3 Signaling Pathway
Source: MDPI journal article supplement (doi:10.3390/molecules28041932), 2023-02-17
Supplement: s1 [file s1]

**Confusoside from *Anneslea fragrans* Alleviates  
Acetaminophen-Induced Liver Injury in HepG2 via PI3K-CASP3  
Signaling Pathway**

## Contents of Supporting Information

| No. | Contents                                                       | Page |
|-----|----------------------------------------------------------------|------|
| 1   | Table S1 The correlated targes of liver injury and confusoside | 3-6  |

| name         | Gene     | name        | Gene     |
|--------------|----------|-------------|----------|
| Liver injury | SEC63    | Confusoside | SLC5A2   |
| Liver injury | PKD1     | Confusoside | SLC5A1   |
| Liver injury | TP53     | Confusoside | TYR      |
| Liver injury | IL6      | Confusoside | SRD5A1   |
| Liver injury | PRKCSH   | Confusoside | SLC5A4   |
| Liver injury | TNF      | Confusoside | SLC28A3  |
| Liver injury | PKHD1    | Confusoside | EPHX2    |
| Liver injury | GANAB    | Confusoside | AKR1B1   |
| Liver injury | CTNNB1   | Confusoside | CYP19A1  |
| Liver injury | MIR122   | Confusoside | ADORA2A  |
| Liver injury | NBAS     | Confusoside | PTPN1    |
| Liver injury | MARS1    | Confusoside | SLC29A1  |
| Liver injury | GPT      | Confusoside | SLC28A2  |
| Liver injury | ALB      | Confusoside | PDE5A    |
| Liver injury | PKD2     | Confusoside | PTPN2    |
| Liver injury | PNPLA3   | Confusoside | TDP1     |
| Liver injury | TSC2     | Confusoside | IMPDH1   |
| Liver injury | HFE      | Confusoside | MMP1     |
| Liver injury | ABCB11   | Confusoside | MMP7     |
| Liver injury | MIR21    | Confusoside | MMP8     |
| Liver injury | APOE     | Confusoside | TOP1     |
| Liver injury | KRT18    | Confusoside | ADORA1   |
| Liver injury | SERPINA1 | Confusoside | CA14     |
| Liver injury | F2       | Confusoside | ADORA2B  |
| Liver injury | TERT     | Confusoside | IGFBP3   |
| Liver injury | IL10     | Confusoside | TERT     |
| Liver injury | NR1H4    | Confusoside | HRAS     |
| Liver injury | RINT1    | Confusoside | YARS     |
| Liver injury | LRP5     | Confusoside | HSP90AB1 |
| Liver injury | PHKA2    | Confusoside | ADK      |
| Liver injury | MET      | Confusoside | MGMT     |
| Liver injury | EGF      | Confusoside | EGFR     |
| Liver injury | APC      | Confusoside | HCAR2    |
| Liver injury | ALG9     | Confusoside | DNTT     |
| Liver injury | MIR34A   | Confusoside | ALB      |
| Liver injury | ABCB4    | Confusoside | PIK3CA   |
| Liver injury | TGFB1    | Confusoside | PIM1     |
| Liver injury | TSC1     | Confusoside | AGTR1    |
| Liver injury | HNF1A    | Confusoside | DYRK2    |
| Liver injury | INS      | Confusoside | PYGL     |
| Liver injury | MIR155   | Confusoside | IGFBP5   |

|              |          |             |                        |
|--------------|----------|-------------|------------------------|
| Liver injury | SLC17A5  | Confusoside | MMP9                   |
| Liver injury | KRT8     | Confusoside | CSNK2A1                |
| Liver injury | CASP8    | Confusoside | MAPK8                  |
| Liver injury | PIK3CA   | Confusoside | CASP3                  |
| Liver injury | AFP      | Confusoside | ESR1                   |
| Liver injury | NAFLD1   | Confusoside | PNP                    |
| Liver injury | CYP2E1   | Confusoside | KDM3A                  |
| Liver injury | MIR146A  | Confusoside | CXCR2                  |
| Liver injury | GYS2     | Confusoside | KDM4C                  |
| Liver injury | FABP1    | Confusoside | ITK                    |
| Liver injury | IL1B     | Confusoside | IRAK4                  |
| Liver injury | PPARG    | Confusoside | KDM4A                  |
| Liver injury | PYGL     | Confusoside | HSPA8                  |
| Liver injury | HADHA    | Confusoside | HSPA5                  |
| Liver injury | ABCC2    | Confusoside | FYN                    |
| Liver injury | NAFLD2   | Confusoside | TTR                    |
| Liver injury | CPT1A    | Confusoside | SELE                   |
| Liver injury | GGT1     | Confusoside | TYMP                   |
| Liver injury | POLG     | Confusoside | BCL2A1                 |
| Liver injury | MIR17    | Confusoside | VCP                    |
| Liver injury | MIR27A   | Confusoside | MME                    |
| Liver injury | ARG1     | Confusoside | PARP1                  |
| Liver injury | HNF4A    | Confusoside | PTGER1                 |
| Liver injury | CYP3A4   | Confusoside | GSK3B                  |
| Liver injury | CXCL8    | Confusoside | AMPD3                  |
| Liver injury | SERPINE1 | Confusoside | CDC25B                 |
| Liver injury | CRP      | Confusoside | RAF1                   |
| Liver injury | MIR15A   | Confusoside | ATIC                   |
| Liver injury | FARSB    | Confusoside | ALOX12                 |
| Liver injury | IGF2R    | Confusoside | BRAF                   |
| Liver injury | UGT1A1   | Confusoside | ITGB1<br>ITGA4         |
| Liver injury | HGF      | Confusoside | MARS                   |
| Liver injury | SLCO1B1  | Confusoside | P2RX3                  |
| Liver injury | HMOX1    | Confusoside | AKR1B10                |
| Liver injury | TLR4     | Confusoside | DHODH                  |
| Liver injury | LARS1    | Confusoside | CDK2<br>CCNA1<br>CCNA2 |
| Liver injury | IFNG     | Confusoside | SLC2A1                 |
| Liver injury | ATP8B1   | Confusoside | BMP1                   |
| Liver injury | GFER     | Confusoside | PRKACA                 |
| Liver injury | SOD1     | Confusoside | LGALS4                 |

|              |          |             |         |
|--------------|----------|-------------|---------|
| Liver injury | MIR223   | Confusoside | PDE7A   |
| Liver injury | AXIN1    | Confusoside | LGALS8  |
| Liver injury | KRAS     | Confusoside | NR4A1   |
| Liver injury | HLA-DRB1 | Confusoside | GBA     |
| Liver injury | NOS2     | Confusoside | RARS    |
| Liver injury | ALG8     | Confusoside | MAPK9   |
| Liver injury | MIR203A  | Confusoside | ECE1    |
| Liver injury | ATP7B    | Confusoside | LTA4H   |
| Liver injury | MIR200B  | Confusoside | FOLH1   |
| Liver injury | IGF1     | Confusoside | SCN4A   |
| Liver injury | MIR22    | Confusoside | SCN2A   |
| Liver injury | CDKN3    | Confusoside | BCL2L2  |
| Liver injury | MIR221   | Confusoside | PPP1CA  |
| Liver injury | MIR106B  | Confusoside | RNASEH1 |
| Liver injury | MIR181B1 | Confusoside | TYMS    |
| Liver injury | APOA1    | Confusoside | PRKCA   |
| Liver injury | CPT2     | Confusoside | CHIA    |
| Liver injury | G6PC1    | Confusoside | CASP6   |
| Liver injury | MIR143   | Confusoside | CASP7   |
| Liver injury | MIR222   |             |         |
| Liver injury | CASP3    |             |         |
| Liver injury | MIR93    |             |         |
| Liver injury | MIR181A1 |             |         |
| Liver injury | MIR29A   |             |         |
| Liver injury | SLC25A13 |             |         |
| Liver injury | MIR25    |             |         |
| Liver injury | MIR20A   |             |         |
| Liver injury | STAT3    |             |         |
| Liver injury | FAH      |             |         |
| Liver injury | MMP9     |             |         |
| Liver injury | HAMP     |             |         |
| Liver injury | PPARA    |             |         |
| Liver injury | TTR      |             |         |
| Liver injury | DNAJB11  |             |         |
| Liver injury | MIR19A   |             |         |
| Liver injury | EPO      |             |         |
| Liver injury | MIR195   |             |         |
| Liver injury | ADIPOQ   |             |         |
| Liver injury | NR1H3    |             |         |
| Liver injury | MAPK1    |             |         |
| Liver injury | MIR23B   |             |         |
| Liver injury | MIR127   |             |         |
| Liver injury | F5       |             |         |

|              |          |  |  |
|--------------|----------|--|--|
| Liver injury | MIR181A2 |  |  |
| Liver injury | TF       |  |  |
| Liver injury | CP       |  |  |
| Liver injury | CYP1A2   |  |  |
| Liver injury | PDGFRL   |  |  |
| Liver injury | MIR191   |  |  |
| Liver injury | VEGFA    |  |  |
