# Supplementary material for: Confusoside from Anneslea fragrans Alleviates Acetaminophen-Induced Liver Injury in HepG2 via PI3K-CASP3 Signaling Pathway
Source: MDPI journal article supplement (doi:10.3390/molecules28041932), 2023-02-17

**Confusoside from *Anneslea fragrans* Alleviates  
Acetaminophen-Induced Liver Injury in HepG2 via PI3K-CASP3  
Signaling Pathway**

## Contents of Supporting Information

| No. | Contents                                                          | Page |
|-----|-------------------------------------------------------------------|------|
| 1   | Figure S1 The $^1\text{H}$ NMR spectra of confusoside             | 3    |
| 2   | Figure S2 The $^{13}\text{C}$ and DEPT NMR spectra of confusoside | 4    |

**Figure S1** The  $^1\text{H}$  NMR spectra of CF

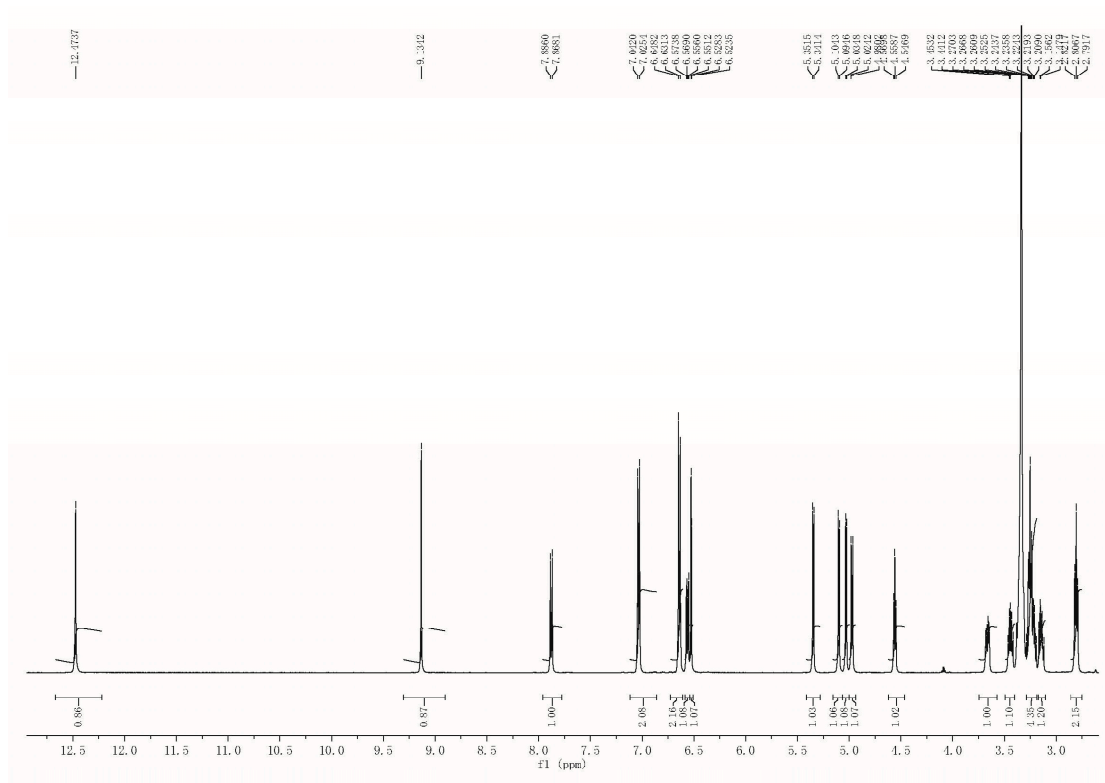

**Figure S2** The  $^{13}\text{C}$  and DEPT NMR spectra of **CF**

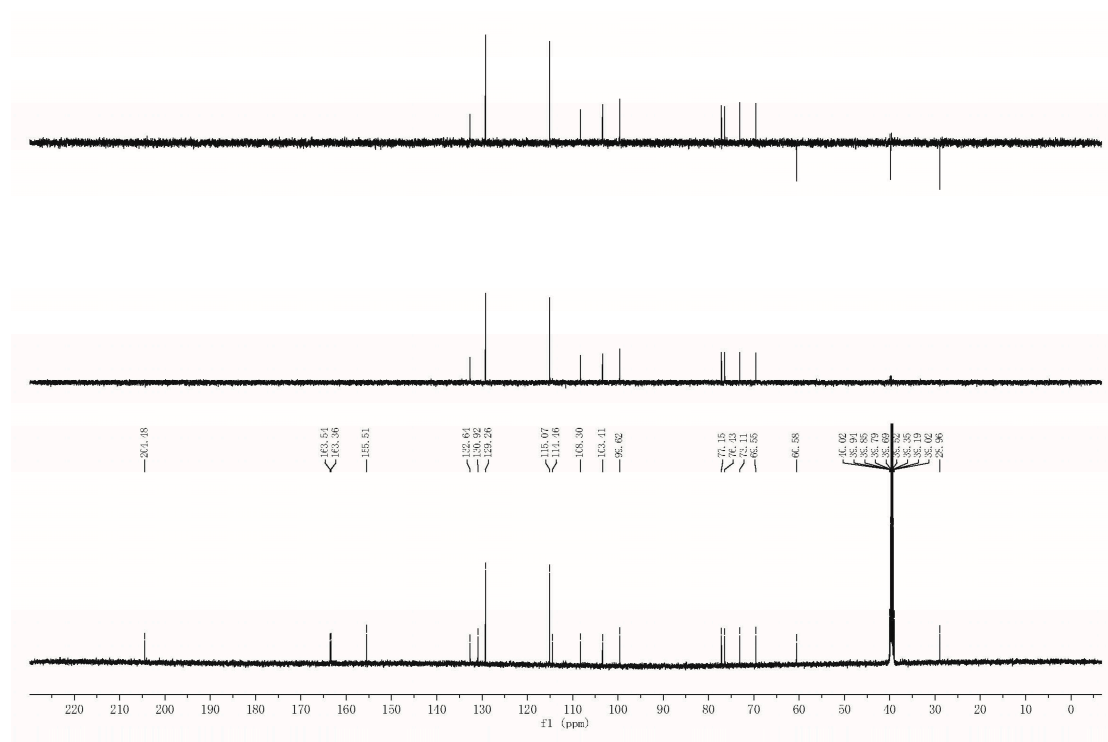

Supplement: s1 [file s1]
